# Supplementary material
Source: Springer Nature journal article supplement (https://www.springermedizin.de/resource/supplementary/12874_2012_872_MOESM5_ESM.pdf/9432674)
Supplement: MOESM5 [file 9432674]

**Controls (n=25)****Sport (n=67)****Music (n=82)****Artwork (n=23)**
